# Supplementary material for: [C(NH2)3]BiCl2SO4: an excellent birefringent material obtained by multifunctional group synergy
Source: Royal Society of Chemistry journal article supplement (doi:10.1039/d2qi01675c), 2022-01-01
Supplement: d2qi01675c1.pdf [file d2qi01675c1.pdf]

Electronic Supporting Information

**[C(NH<sub>2</sub>)<sub>3</sub>]BiCl<sub>2</sub>SO<sub>4</sub>: An Excellent Birefringent Material by a  
Multifunctional Group Synergy**

*Xuehua Dong,<sup>a</sup> Zhizhuan Zhang,<sup>b</sup> Ling Huang,<sup>a</sup> and Guohong Zou<sup>\*b</sup>*

<sup>a</sup> College of Chemistry and Materials Science, Sichuan Normal University, Chengdu, 610066, P. R. China.

<sup>b</sup> College of Chemistry, Sichuan University, Chengdu, 610065, P. R. China.

## Table of contents

| Sections   | Titles                                                                                                                                                                                                                                                                                                           | Pages   |
|------------|------------------------------------------------------------------------------------------------------------------------------------------------------------------------------------------------------------------------------------------------------------------------------------------------------------------|---------|
| Section S1 | Experimental section (Instrumentations and Computational Descriptions).                                                                                                                                                                                                                                          | S3-S5   |
| Table S1   | Crystal data and structure refinement for $\text{GuBiCl}_2\text{SO}_4$ .                                                                                                                                                                                                                                         | S6      |
| Table S2   | Atomic coordinates and equivalent isotropic displacement parameters, and calculated Bond Valence Sum for $\text{GuBiCl}_2\text{SO}_4$ . $U_{(\text{eq})}$ is defined as one third of the trace of the orthogonalized $U_{ij}$ tensor.                                                                            | S7      |
| Table S3   | Bond lengths [ $\text{\AA}$ ] and angles [ $^\circ$ ] for $\text{GuBiCl}_2\text{SO}_4$ .                                                                                                                                                                                                                         | S8      |
| Table S4   | Summarization of bismuth-based luminescence compounds.                                                                                                                                                                                                                                                           | S9      |
| Fig. S1    | Photograph of $\text{GuBiCl}_2\text{SO}_4$ crystals.                                                                                                                                                                                                                                                             | S10     |
| Fig. S2    | Bond lengths of (a) $[\text{SiO}_4]^{2-}$ , $[\text{S}_2\text{O}_4]^{2-}$ tetrahedra, (b) $[\text{Bi}_1\text{Cl}_2\text{O}_4]^{7-}$ , $[\text{Bi}_2\text{Cl}_2\text{O}_4]^{7-}$ polyhedra and $[\text{C}_1(\text{NH}_2)_3]^+$ , $[\text{C}_2(\text{NH}_2)_3]^+$ groups in $\text{GuBiCl}_2\text{SO}_4$ .         | S10     |
| Fig. S3    | Energy-dispersive analysis by X-ray (EDX) data for $\text{GuBiCl}_2\text{SO}_4$ .                                                                                                                                                                                                                                | S10     |
| Fig. S4    | Powder X-ray diffraction pattern for the residue of $\text{GuBiCl}_2\text{SO}_4$ for TGA.                                                                                                                                                                                                                        | S11     |
| Fig. S5    | IR spectrum of compound $\text{GuBiCl}_2\text{SO}_4$ . ( In a dry environment, 100 mg KBr and 1 mg solid sample were fully ground in an agate mortar, and a special tableting device was used to press the sample into a transparent sheet with a diameter of 13 mm and a thickness of about 1 mm for analysis.) | S11     |
| Fig. S6    | Valence-band maximum (VBM) (a) and conduction-band minimum (CBM) (b) orbital wave function of $\text{GuBiCl}_2\text{SO}_4$ .                                                                                                                                                                                     | S11     |
| Fig. S7    | 3D EDD map of $\text{GuBiCl}_2\text{SO}_4$ .                                                                                                                                                                                                                                                                     | S12     |
| References |                                                                                                                                                                                                                                                                                                                  | S13-S14 |

## Section S1. Experimental section

### Instrumentations.

Suitable single crystals were selected under an optical microscope. Crystal structure determination of  $\text{GuBiCl}_2\text{SO}_4$  was performed on a Bruker SMART BREEZE diffractometer with graphite-monochromated  $\text{MoK}\alpha$  radiation ( $\lambda = 0.71073 \text{ \AA}$ ) at room temperature. All absorption corrections were performed by using the SADABS program. The structure was solved by direct methods and refined by full-matrix least squares on  $F^2$  using the SHELX-97 program package.<sup>[1,2]</sup> All of the structures were verified using the ADDSYM algorithm from the program PLATON and no higher symmetries were found.<sup>[3]</sup> Crystallographic data and structural refinements for the compound are summarized in Table S1. Atomic coordinates and isotropic displacement coefficients, and selected bond lengths for the compound are listed in Tables S2-S3.

Elemental analysis was performed on a scanning electron microscope FESEM, SU-8010. The collected crystals of  $\text{GuBiCl}_2\text{SO}_4$  were mounted on one flat face and coated with 25 nm carbon, respectively. And the element was qualitatively analyzed.

Powder XRD patterns were obtained using a Rigaku Smartlab powder X-ray diffractometer with  $\text{CuK}\alpha$  radiation ( $\lambda = 1.54056 \text{ \AA}$ ), in the angular range of  $2\theta = 5-50^\circ$ , and with a scan step width of  $0.05^\circ$  and a fixed time of 0.2 s.

Thermogravimetric analysis (TGA) was performed on a Netzsch STA 409 PC. A 10 mg crystal sample was sealed in a platinum crucible and heated from room temperature to  $800 \text{ }^\circ\text{C}$  at a rate of  $10 \text{ }^\circ\text{C}/\text{min}$  in a  $\text{N}_2$  atmosphere.

An infrared spectrum in the range of  $4000-400 \text{ cm}^{-1}$  was recorded on a Vertex 70 Fourier transform infrared (FT-IR) spectrometer with KBr as the diluent. KBr (100 mg) and solid sample (1 mg) were fully ground in an agate mortar, and a special tableting device was used to press the sample into a transparent sheet with a diameter of 13 mm and a thickness of about 1 mm for analysis.

The UV-vis diffuse reflectance spectrum of  $\text{GuBiCl}_2\text{SO}_4$  was recorded using a Shimadzu UV-2600 spectrophotometer with  $\text{BaSO}_4$  plate as a standard (100% reflectance). The Kubelka-Munk function is used to calculate the absorption spectrum from the reflection spectrum:  $F(R) = \alpha/S = (1-R)^2/2R$ , where R is the reflectance,  $\alpha$  is the absorption coefficient, and S is the scattering

coefficient.<sup>[4]</sup>

The photoluminescence (PL) properties of  $\text{GuBiCl}_2\text{SO}_4$  was characterized by an Edinburgh FS-5 fluorescence spectrometer with a calibrated integrating sphere system. The time-resolved PL decay was measured on a Fluoromax-3 fluorescence spectrometer.

The birefringence of  $\text{GuBiCl}_2\text{SO}_4$  was characterized by using the polarizing microscope equipped (ZEISS Axio Scope. A1) with Berek compensator. The wavelength of the light source was 546 nm. Owing to the clear boundary lines of the first-, second- and third-order interference color, the relative error was small enough. Before the scanning, the small and transparent  $\text{GuBiCl}_2\text{SO}_4$  crystals were chosen to measure, in order to improve the accuracy of the birefringence. The formula for calculating the birefringence is listed below,

$$R = |N_e - N_o| \times T = \Delta n \times T$$

Here, R represents the optical path difference,  $\Delta n$  means the birefringence, and T denotes the thickness of the crystal.

### **Computational Descriptions.**

The first-principles calculations of  $\text{GuBiCl}_2\text{SO}_4$  were carried out by using the CASTEP software package to understand the relationship between structure and properties.<sup>[5]</sup> The band structure, density of states (DOS)/partial DOS (PDOS), birefringence and electron-density difference map of  $\text{GuBiCl}_2\text{SO}_4$  were computed. The generalized gradient approximation (GGA) with Perdew-Burke-Ernzerh (PBE) functional was adopted for all calculations.<sup>[6]</sup> Norm-conserving were employed for all the atoms.<sup>[7]</sup> The criteria of convergences of energy are set as  $1.0\text{e-}6$  eV/atom. Moreover, the kinetic energy cutoff of 800 eV for  $\text{GuBiCl}_2\text{SO}_4$  was chosen and the k-point sampling in the Brillouin zone was used to be  $5 \times 5 \times 5$  for  $\text{GuBiCl}_2\text{SO}_4$ .<sup>[8]</sup> The rest parameters used in the calculations were set by the default values of the CASTEP. The valences of composed atoms were as follow: O  $2s^22p^4$ , C  $2s^22p^2$ , N  $2s^22p^3$ , Cl  $3s^23p^5$  S  $3s^23p^4$ , H  $1s^1$  and Bi  $6s^26p^35d^{10}$ .

The Vienna ab initio Simulation Package (VASP), a planewave code (with PAW scalar-relativistic pseudopotentials),<sup>[9]</sup> was employed for calculating the electronic structures of bulk  $\text{GuBiCl}_2\text{SO}_4$ . During all the calculations, the generalized gradient approximation (GGA) with the Perdew-Burke-Ernzerhof (PBE) functional,<sup>[6]</sup> and the density functional dispersion correction (DFT-D3) employing the BJ-damping (-D3(BJ)) were applied.<sup>[10]</sup> The VASPKIT and VESTA softwares were used to obtain the orbital wavefunctions<sup>[11]</sup>



**Table S1.** Crystal data and structure refinement for GuBiCl<sub>2</sub>SO<sub>4</sub>.

| Compound                                      | GuBiCl <sub>2</sub> SO <sub>4</sub> |
|-----------------------------------------------|-------------------------------------|
| Formula Mass                                  | 872.06                              |
| Crystal System                                | Triclinic                           |
| Space Group                                   | $P\bar{1}$                          |
| $a$ (Å)                                       | 6.4179 (2)                          |
| $b$ (Å)                                       | 12.8984 (4)                         |
| $c$ (Å)                                       | 12.9703 (4)                         |
| $\alpha$ (°)                                  | 61.965 (3)                          |
| $\beta$ (°)                                   | 88.400 (2)                          |
| $\gamma$ (°)                                  | 76.935 (2)                          |
| $V$ (Å <sup>3</sup> )                         | 919.33 (5)                          |
| $Z$                                           | 2                                   |
| $\rho$ (calcd) (g/cm <sup>3</sup> )           | 3.150                               |
| Temperature (K)                               | 293                                 |
| $\lambda$ (Å)                                 | 0.71073                             |
| $F(000)$                                      | 792                                 |
| $\mu$ (mm <sup>-1</sup> )                     | 19.968                              |
| $R_1, wR_2$ ( $I > 2\sigma(I)$ ) <sup>a</sup> | 0.0335/ 0.1041                      |
| GOF on $F^2$                                  | 1.144                               |

$$^a R_1(F) = \sum ||F_o| - |F_c| || / \sum |F_o|, wR_2(F_o^2) = [\sum w(F_o^2 - F_c^2)^2 / \sum w(F_o^2)^2]^{1/2}$$

**Table S2.** Atomic coordinates and equivalent isotropic displacement parameters, and calculated Bond Valence Sum for  $\text{GuBiCl}_2\text{SO}_4$ .  $U_{\text{eq}}$  is defined as one third of the trace of the orthogonalized  $U_{ij}$  tensor.

| atom | $x$          | $y$          | $z$          | $U_{\text{eq}}(\text{\AA}^2)$ | BVS  |
|------|--------------|--------------|--------------|-------------------------------|------|
| Bi1  | 0.19954 (4)  | 0.26400 (3)  | 0.66499 (3)  | 0.01618 (10)                  | 2.94 |
| Bi2  | -0.34574 (4) | 0.40729 (3)  | 0.33280 (3)  | 0.01636 (10)                  | 2.94 |
| S1   | 0.6841 (3)   | 0.28964 (19) | 0.65623 (18) | 0.0156 (4)                    | 5.90 |
| S2   | 0.1408 (3)   | 0.42725 (18) | 0.34328 (18) | 0.0158 (4)                    | 6.06 |
| Cl1  | 0.3219 (4)   | 0.1448 (2)   | 0.8865 (2)   | 0.0336 (6)                    | 0.77 |
| Cl2  | 0.1986 (4)   | 0.0803 (2)   | 0.6435 (2)   | 0.0344 (6)                    | 0.92 |
| Cl3  | -0.3327 (4)  | 0.1936 (2)   | 0.3835 (2)   | 0.0301 (5)                    | 0.96 |
| Cl4  | -0.2874 (4)  | 0.4796 (2)   | 0.1141 (2)   | 0.0338 (6)                    | 0.76 |
| O1   | 0.8559 (9)   | 0.2304 (6)   | 0.7538 (5)   | 0.0228 (14)                   | 1.82 |
| O2   | 0.7875 (9)   | 0.3455 (6)   | 0.5465 (5)   | 0.0238 (14)                   | 1.74 |
| O3   | 0.5143 (10)  | 0.3773 (6)   | 0.6718 (6)   | 0.0267 (15)                   | 1.72 |
| O4   | 0.5759 (8)   | 0.1983 (5)   | 0.6561 (5)   | 0.0185 (12)                   | 1.86 |
| O5   | 0.2748 (10)  | 0.3864 (6)   | 0.4524 (6)   | 0.0270 (14)                   | 1.78 |
| O6   | 0.2864 (9)   | 0.4502 (6)   | 0.2483 (5)   | 0.0224 (14)                   | 1.84 |
| O7   | -0.0285 (9)  | 0.5341 (6)   | 0.3151 (6)   | 0.0278 (15)                   | 1.81 |
| O8   | 0.0376 (10)  | 0.3315 (6)   | 0.3544 (6)   | 0.0241 (14)                   | 1.91 |
| C1   | 0.2193 (15)  | 0.7893 (9)   | -0.0293 (9)  | 0.029 (2)                     | 4.27 |
| C2   | 0.7660 (14)  | -0.1333 (9)  | 0.7661 (10)  | 0.031 (2)                     | 4.08 |
| N1   | 0.8048 (14)  | -0.2514 (8)  | 0.8256 (9)   | 0.047 (3)                     | 3.49 |
| H1A  | 0.797433     | -0.286442    | 0.900275     | 0.057*                        | /    |
| H1B  | 0.837610     | -0.294026    | 0.790067     | 0.057*                        | /    |
| N2   | 0.7746 (14)  | -0.0804 (10) | 0.6487 (10)  | 0.053 (3)                     | 3.41 |
| H2A  | 0.805077     | -0.124327    | 0.614334     | 0.063*                        | /    |
| H2B  | 0.749562     | -0.002930    | 0.608286     | 0.063*                        | /    |
| N3   | 0.7151 (13)  | -0.0651 (7)  | 0.8183 (8)   | 0.041 (2)                     | 3.50 |
| H3A  | 0.706855     | -0.098321    | 0.892905     | 0.049*                        | /    |
| H3B  | 0.690204     | 0.012402     | 0.777649     | 0.049*                        | /    |
| N4   | 0.1878 (17)  | 0.6874 (9)   | 0.0519 (9)   | 0.052 (3)                     | 2.48 |
| H4A  | 0.212683     | 0.625150     | 0.040899     | 0.063*                        | /    |
| H4B  | 0.142024     | 0.682205     | 0.116718     | 0.063*                        | /    |
| N5   | 0.2893 (15)  | 0.7992 (9)   | -0.1290 (8)  | 0.043 (2)                     | 3.54 |
| H5A  | 0.314800     | 0.737608     | -0.141184    | 0.052*                        | /    |
| H5B  | 0.309498     | 0.867219     | -0.182119    | 0.052*                        | /    |
| N6   | 0.1742 (12)  | 0.8848 (8)   | -0.0119 (8)  | 0.035 (2)                     | 3.52 |
| H6A  | 0.124652     | 0.878857     | 0.052406     | 0.042*                        | /    |
| H6B  | 0.194272     | 0.952876     | -0.065020    | 0.042*                        | /    |

**Table S3.** Selected Bond lengths (Å) and angles (deg) for GuBiCl<sub>2</sub>SO<sub>4</sub>.

|                                       |             |                                        |            |
|---------------------------------------|-------------|----------------------------------------|------------|
| Bi1—Cl2                               | 2.513 (2)   | S2—O8                                  | 1.477 (6)  |
| Bi1—Cl1                               | 2.581 (2)   | S2—O7                                  | 1.444 (6)  |
| Bi1—O4                                | 2.391 (5)   | S2—O6                                  | 1.482 (6)  |
| Bi1—O5                                | 2.551 (7)   | S1—O4                                  | 1.497 (6)  |
| Bi1—O7 <sup>i</sup>                   | 2.717 (6)   | S1—O3                                  | 1.467 (6)  |
| Bi1—O1 <sup>ii</sup>                  | 2.490 (6)   | S1—O2                                  | 1.478 (6)  |
| Bi2—Cl3                               | 2.497 (2)   | S1—O1                                  | 1.480 (6)  |
| Bi2—Cl4                               | 2.582 (2)   | N2—C2                                  | 1.351 (14) |
| Bi2—O3 <sup>i</sup>                   | 2.717 (6)   | C2—N1                                  | 1.309 (13) |
| Bi2—O8                                | 2.405 (6)   | C2—N3                                  | 1.325 (13) |
| Bi2—O2 <sup>ii</sup>                  | 2.607 (6)   | N5—C1                                  | 1.315 (13) |
| Cl2—Bi1—Cl1                           | 95.19 (9)   | O6 <sup>ii</sup> —Bi2—O3 <sup>i</sup>  | 80.3 (2)   |
| Cl2—Bi1—O5                            | 93.37 (17)  | O6 <sup>ii</sup> —Bi2—O2 <sup>ii</sup> | 129.0 (2)  |
| Cl2—Bi1—O7 <sup>i</sup>               | 156.73 (14) | O5—S2—O6                               | 107.0 (4)  |
| Cl1—Bi1—O7 <sup>i</sup>               | 90.26 (16)  | O8—S2—O5                               | 110.3 (4)  |
| O4—Bi1—Cl2                            | 80.88 (16)  | O8—S2—O6                               | 108.8 (4)  |
| O4—Bi1—Cl1                            | 80.59 (15)  | O7—S2—O5                               | 112.8 (4)  |
| O4—Bi1—O5                             | 73.4 (2)    | O7—S2—O8                               | 107.2 (4)  |
| O4—Bi1—O7 <sup>i</sup>                | 122.37 (19) | O7—S2—O6                               | 110.8 (4)  |
| O4—Bi1—O1 <sup>ii</sup>               | 152.0 (2)   | O3—S1—O4                               | 105.3 (3)  |
| O5—Bi1—Cl1                            | 150.91 (15) | O3—S1—O2                               | 112.9 (4)  |
| O1 <sup>ii</sup> —Bi1—O5              | 130.9 (2)   | O1—S1—O4                               | 110.2 (4)  |
| O1 <sup>ii</sup> —Bi1—O7 <sup>i</sup> | 75.4 (2)    | S1—O4—Bi1                              | 108.3 (3)  |
| Cl3—Bi2—Cl4                           | 95.86 (9)   | S1—O3—Bi2 <sup>i</sup>                 | 153.8 (4)  |
| Cl3—Bi2—O3 <sup>i</sup>               | 154.97 (14) | S2—O5—Bi1                              | 129.2 (3)  |
| Cl3—Bi2—O2 <sup>ii</sup>              | 92.40 (15)  | S2—O8—Bi2                              | 108.8 (3)  |
| Cl4—Bi2—O3 <sup>i</sup>               | 100.52 (16) | S2—O7—Bi1 <sup>i</sup>                 | 150.9 (4)  |
| Cl4—Bi2—O2 <sup>ii</sup>              | 151.81 (14) | S1—O2—Bi2 <sup>iii</sup>               | 129.4 (3)  |
| O8—Bi2—Cl3                            | 81.23 (16)  | S1—O1—Bi1 <sup>iii</sup>               | 107.1 (3)  |
| O8—Bi2—Cl4                            | 81.79 (17)  | S2—O6—Bi2 <sup>iii</sup>               | 108.4 (3)  |
| O8—Bi2—O3 <sup>i</sup>                | 119.6 (2)   | N1—C2—N2                               | 118.8 (10) |
| O8—Bi2—O2 <sup>ii</sup>               | 72.9 (2)    | N1—C2—N3                               | 121.5 (10) |
| O8—Bi2—O6 <sup>ii</sup>               | 154.5 (2)   | N3—C2—N2                               | 119.7 (10) |
| O2 <sup>ii</sup> —Bi2—O3 <sup>i</sup> | 82.0 (2)    | N5—C1—N6                               | 120.0 (10) |
| O6 <sup>ii</sup> —Bi2—Cl3             | 84.55 (16)  | N4—C1—N5                               | 121.0 (11) |
| O6 <sup>ii</sup> —Bi2—Cl4             | 78.69 (15)  | N4—C1—N6                               | 119.0 (11) |

Symmetry codes: (i)  $-x, -y+1, -z+1$ ; (ii)  $x-1, y, z$ ; (iii)  $x+1, y, z$ .



**Table S4.** Summarization of bismuth-based luminescence compounds.

| Compounds                                                                                                | Emission peak (nm) | Emission range (nm) | Mechanism                                               | Refer |
|----------------------------------------------------------------------------------------------------------|--------------------|---------------------|---------------------------------------------------------|-------|
| [NEt <sub>4</sub> ] <sub>3</sub> BiCl <sub>6</sub>                                                       | 475                | NA                  | S → P transition                                        | [12]  |
| Rb <sub>7</sub> Bi <sub>3</sub> Cl <sub>16</sub>                                                         | 610                | 500-800             | [Bi <sub>2</sub> Cl <sub>10</sub> ] <sup>4-</sup> dimer | [13]  |
| (C <sub>6</sub> H <sub>14</sub> N) <sub>3</sub> Bi <sub>2</sub> I <sub>9</sub>                           | 601                | NA                  | [Bi <sub>2</sub> I <sub>9</sub> ] <sup>3-</sup> dimer   | [14]  |
| (PMA) <sub>3</sub> BiBr <sub>6</sub>                                                                     | 405; 510           | 400-700             | S → P transition                                        | [15]  |
| (EnrofloH <sub>2</sub> )BiCl <sub>5</sub> ·Cl·2(H <sub>2</sub> O)·H <sub>3</sub> O                       | 459                | 420-550             | organic cation                                          | [16]  |
| [(C <sub>6</sub> H <sub>11</sub> NH <sub>3</sub> ) <sub>4</sub> BiBr <sub>6</sub> ]Br·CH <sub>3</sub> CN | 441                | 400-500             | [BiBr <sub>6</sub> ] <sup>3-</sup> octahedron           | [17]  |
| (C <sub>8</sub> NH <sub>12</sub> ) <sub>4</sub> BiBr <sub>7</sub> ·H <sub>2</sub> O                      | 450                | 400-600             | free excitons                                           | [18]  |

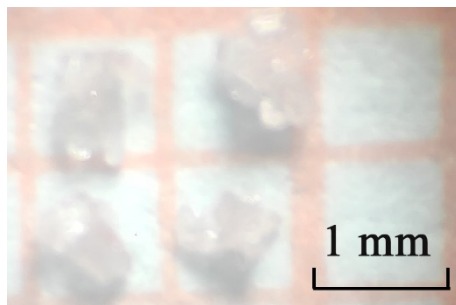

**Fig. S1** Photograph of  $\text{GuBiCl}_2\text{SO}_4$  crystals.

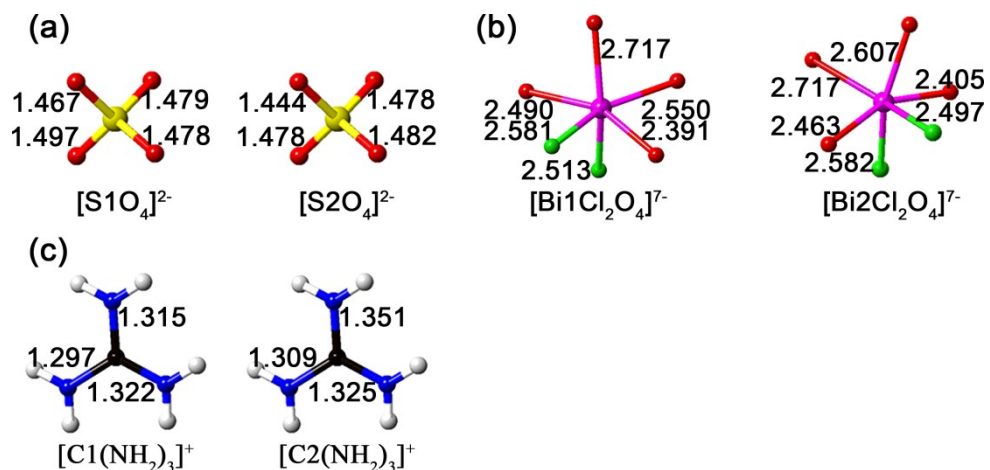

**Fig. S2** Bond lengths of (a)  $[\text{S1O}_4]^{2-}$ ,  $[\text{S2O}_4]^{2-}$  tetrahedra, (b)  $[\text{Bi1Cl}_2\text{O}_4]^{7-}$ ,  $[\text{Bi2Cl}_2\text{O}_4]^{7-}$  polyhedra and  $[\text{C1}(\text{NH}_2)_3]^+$ ,  $[\text{C2}(\text{NH}_2)_3]^+$  groups in  $\text{GuBiCl}_2\text{SO}_4$ .

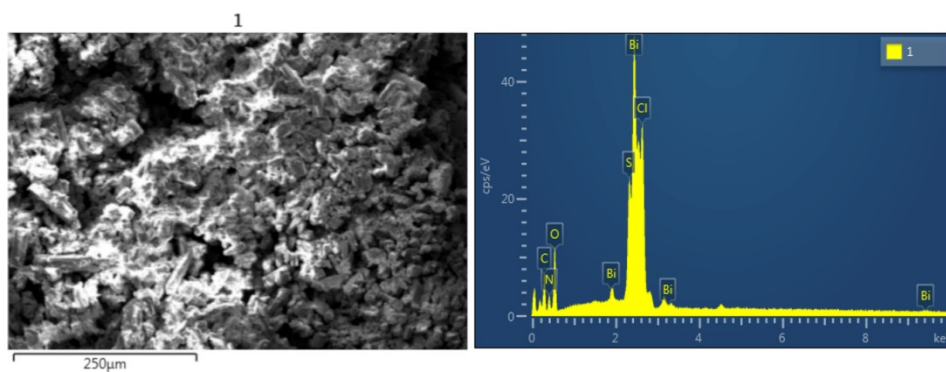

**Fig. S3** Energy-dispersive analysis by X-ray (EDX) data for  $\text{GuBiCl}_2\text{SO}_4$ .

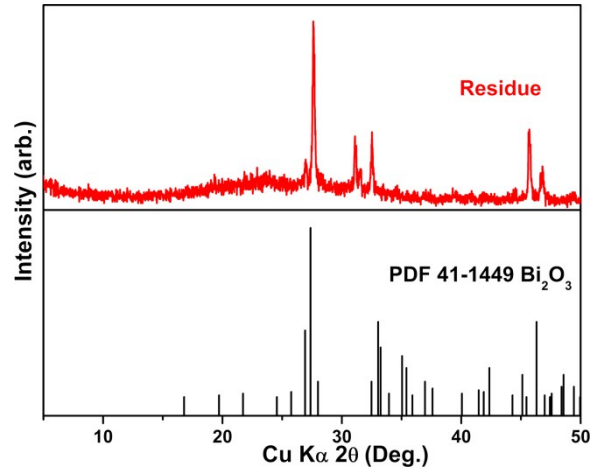

**Fig. S4** Powder X-ray diffraction pattern for the residue of  $\text{GuBiCl}_2\text{SO}_4$  for TGA.

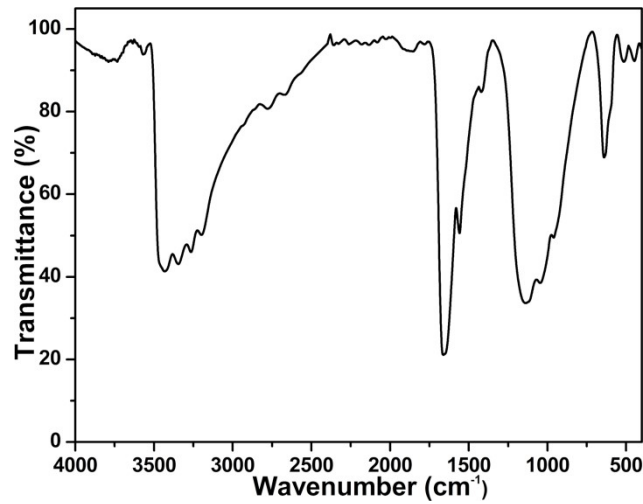

**Fig. S5** IR spectrum of compound  $\text{GuBiCl}_2\text{SO}_4$ . (In a dry environment, 100 mg KBr and 1 mg solid sample were fully ground in an agate mortar, and a special tableting device was used to press the sample into a transparent sheet with a diameter of 13 mm and a thickness of about 1 mm for analysis.)

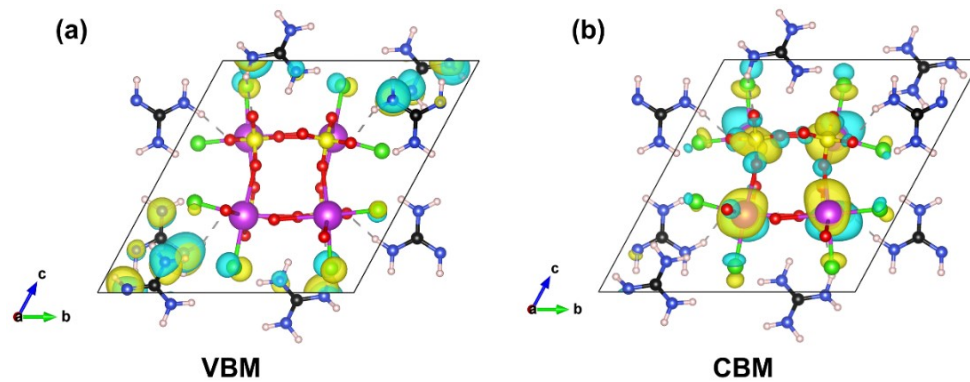

**Fig. S6** Valence-band maximum (VBM) (a) and conduction-band minimum (CBM) (b) orbital wave function of  $\text{GuBiCl}_2\text{SO}_4$ .

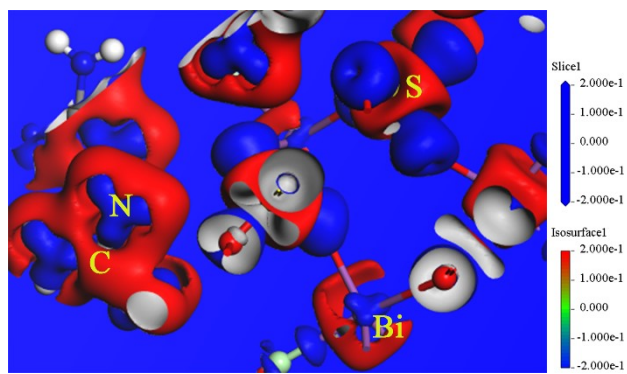

**Fig. S7** 3D EDD map of GuBiCl<sub>2</sub>SO<sub>4</sub>.

## References

- [1] Sheldrick, G. M. A short history of SHELX, *Acta Crystallogr A*. **2008**, 64, 112-122.
- [2] Sheldrick, G. M. SHELXTL-97, Program for crystal structure solution. University of Göttingen, Germany, **1997**.
- [3] A. Spek, Single-crystal structure validation with the program PLATON, *J. Appl. Cryst.* **2003**, 36, 7-13.
- [4] (a) Kubelka, P.; Munk, F. An Article on Optics of Paint Layers. *Z. Technol. Phys.* **1931**, 12, 593-601; (b) Tauc, J. Absorption edge and internal electric fields in amorphous semiconductors. *Mater. Res. Bull.* **1970**, 5, 721-729.
- [5] Clark, S. J.; Segall, M. D.; Pickard, C. J.; Hasnip, P. J.; Probert, M. J.; Refson, K.; Payne, M. C. First principles methods using CASTEP. *Z. Kristall.* **2005**, 220, 567-570.
- [6] Vanderbilt, D. Soft self-consistent pseudopotentials in a generalized eigenvalue formalism. *Phys. Rev. B*. **1990**, 41, 7892-7895.
- [7] Kobayashi, K. Norm-conserving pseudopotential database (NCPS97). *Computational Materials Science*. **1999**, 14, 72-76.
- [8] Monkhorst, H. J.; Pack, J. D. Special Points for Brillouin-Zone Integrations. *Phys. Rev. B*. **1976**, 13, 5188-5192.
- [9] Blöchl, P. E. Projector augmented-wave method. *Phys. Rev. B*, **1994**, 50, 17953.
- [10] Grimme, S.; Antony, J.; Ehrlich, S, et al. A consistent and accurate ab initio parametrization of density functional dispersion correction (DFT-D) for the 94 elements H-Pu. *J. Chem. Phys*, **2010**, 132, 154104.
- [11] K. Momma and F. Izumi, VESTA: A Three-Dimensional Visualization System for Electronic and Structural Analysis, *J. Appl. Crystallogr.*, **2008**, 41, 653-658.
- [12] Nikol, H.; Vogler, A. Photoluminescence of Antimony (III) and Bismuth (III) Complexes in Solution. *J. Am. Chem. Soc.* **1991**, 113, 8988-8990.
- [13] Benin, B. M.; McCall, K. M.; Worle, M.; Morad, V.; Aebli, M.; Yakunin, S.; Shynkarenko, Y.; Kovalenko, M. V. The  $\text{Rb}_7\text{Bi}_{3-3x}\text{Sb}_{3x}\text{Cl}_{16}$  Family: A Fully Inorganic Solid Solution with Room-Temperature Luminescent Members. *Angew. Chem. Int. Edit.* **2020**, 59, 14490-14497.

- [14] Dammak, H.; Yangui, A.; Triki, S.; Abid, Y.; Feki, H. Structural characterization, vibrational, optical properties and DFT investigation of a new luminescent organic-inorganic material:  $(C_6H_{14}N)(3)Bi_2I_9$ . *J. Lumin.* **2015**, 161, 214-220.
- [15] Chen, D.; Dai, F. L.; Hao, X. Q.; Zhou, G. J.; Liu, Q. L.; Wolverton, C.; Zhao, J.; Xia, Z. G. Crystal Structure and Luminescence Properties of Lead-Free Metal Halides:  $(C_6H_5CH_2NH_3)_3MBr_6$  (M = Bi and Sb). *J. Mater. Chem. C* **2020**, 8, 7322-7329.
- [16] Su, B.; Song, G.; Molocheev, M. S.; Golovnev, N. N.; Lesnikov, M. K.; Lin, Z.; Xia, Z. Role of Metal-Chloride Anions in Photoluminescence Regulations for Hybrid Metal Halides. *J. Phys. Chem. Lett.* **2021**, 12, 1918-1925.
- [17] Sun, M. E.; Geng, T.; Yong, X.; Lu, S.; Ai, L.; Xiao, G.; Cai, J.; Zou, B.; Zang, S. Q. Pressure - Triggered Blue Emission of Zero-Dimensional Organic Bismuth Bromide Perovskite. *Adv. Sci.* **2021**, 2004853.
- [18] Zhang, R. L.; Mao, X.; Yang, Y.; Yang, S. Q.; Zhao, W. Y.; Wumaier, T.; Wei, D. H.; Deng, W. Q.; Han, K. L. Air-Stable, Lead-Free Zero-Dimensional Mixed Bismuth-Antimony Perovskite Single Crystals with Ultra-broadband Emission. *Angew. Chem. Int. Edit.* **2019**, 58, 2725-2729.
